# Supplementary figures and images for: The modulation of neural gain facilitates a transition between functional segregation and integration in the brain
Source: eLife journal article supplement (doi:10.7554/elife.31130), 2018-01-29

A)

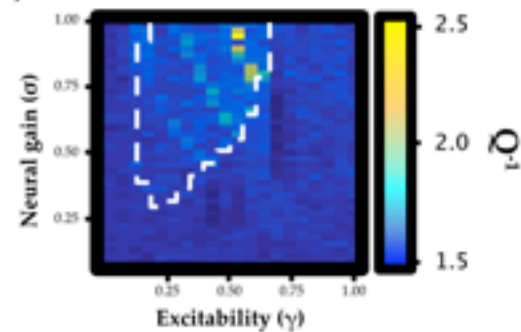

B)

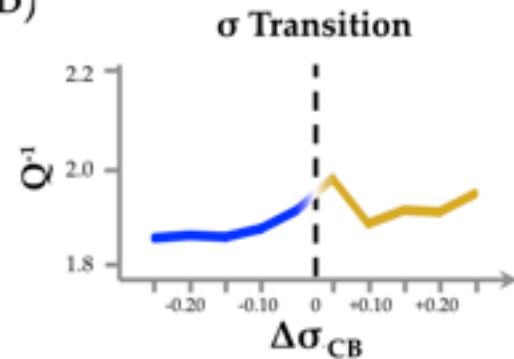

C)

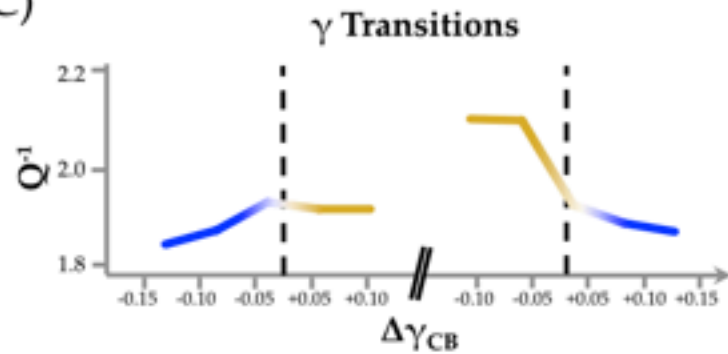

D)

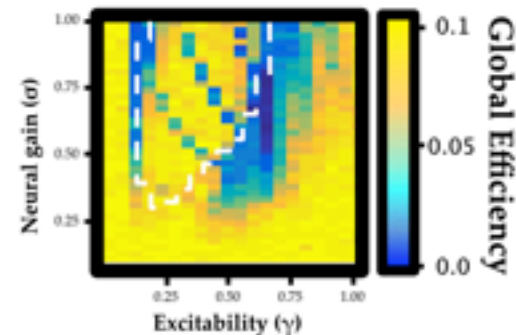

E)

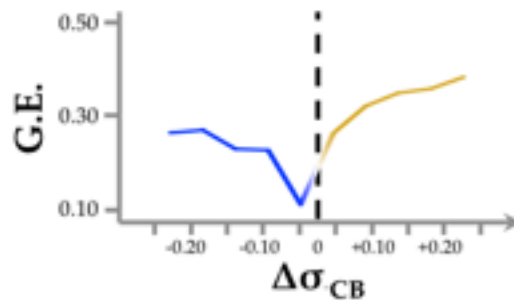

F)

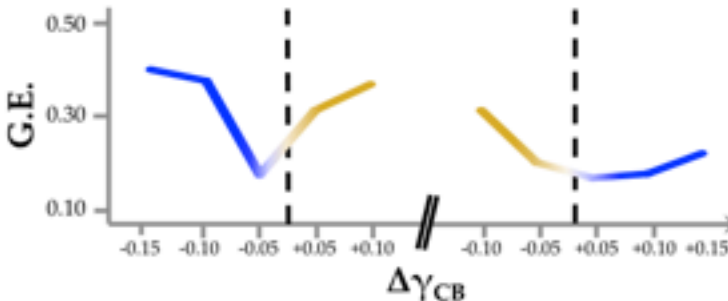

— Asynchronous    — Synchronous    - - Critical Boundary

Supplement: supp [file elife-31130-supp-v1.zip]

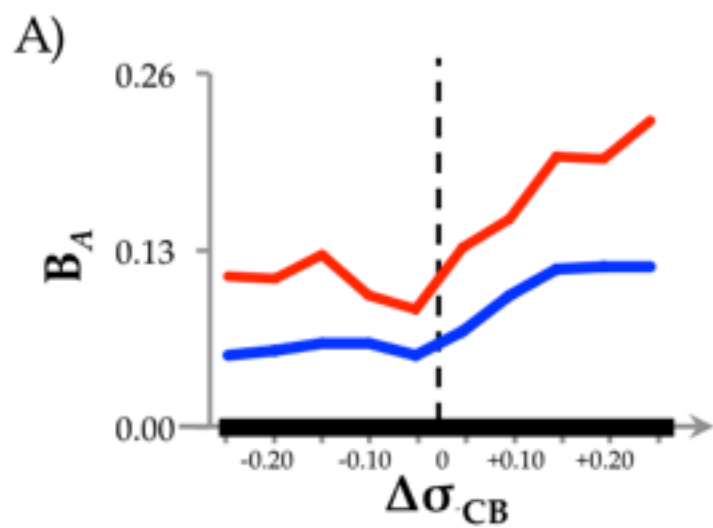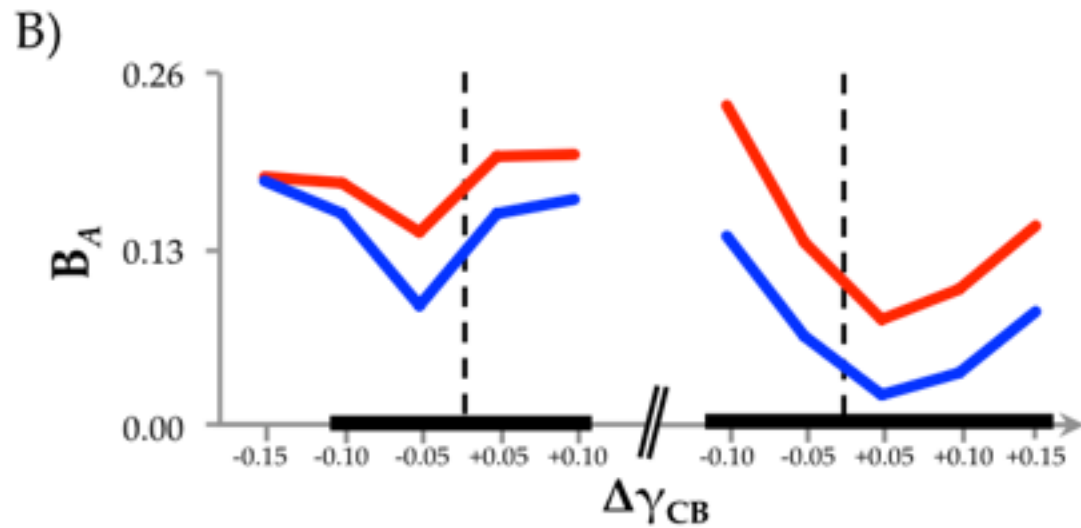

— Diverse — Local - - Critical Boundary

Supplement: supp [file elife-31130-supp-v1.zip]

Left Hemisphere

Right Hemisphere

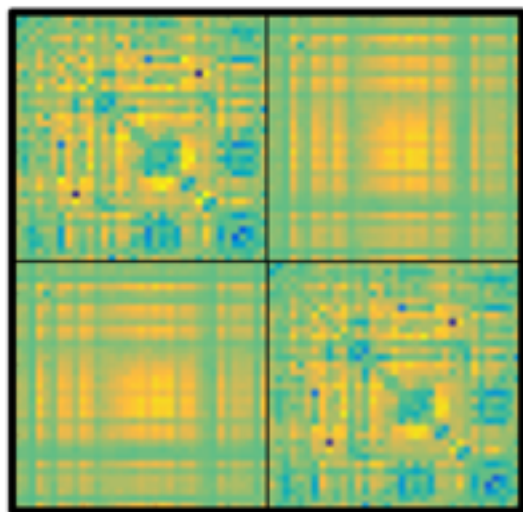

Synchrony

+0.010

+0.005

0.000

-0.005

-0.010

Asynchrony

Supplement: supp [file elife-31130-supp-v1.zip]

A)

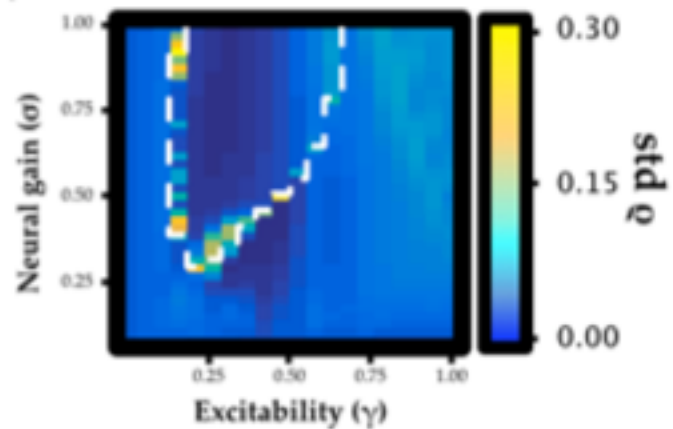

B)

Pre Boundary

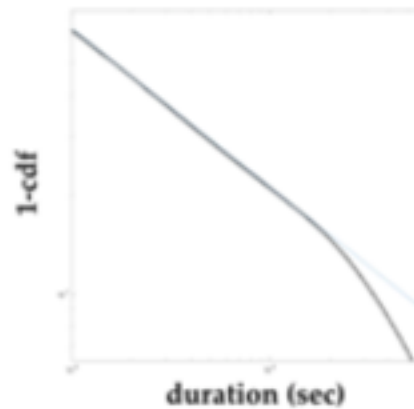

C)

Post Boundary

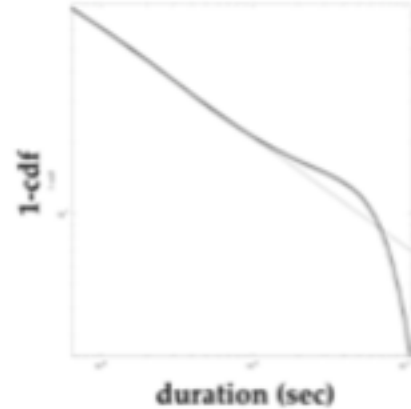

Supplement: supp [file elife-31130-supp-v1.zip]

**a**

Clustering Coefficient

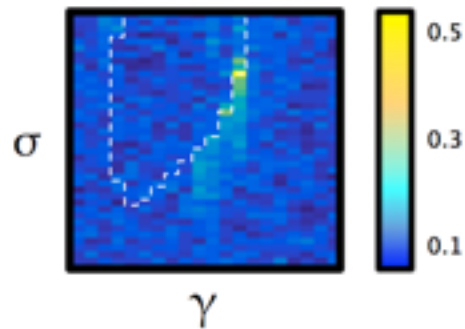**b** $\sigma$  Transition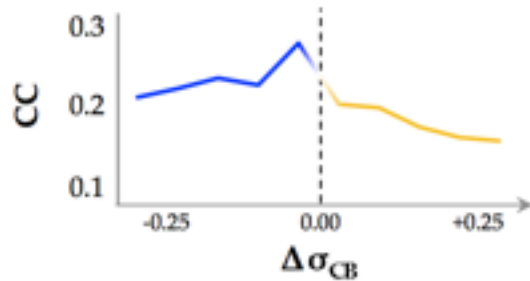**c** $\gamma$  Transitions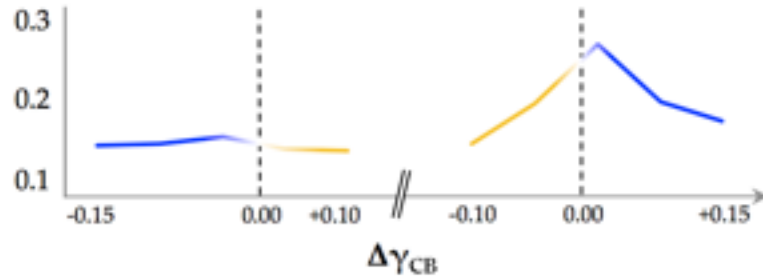

Supplement: supp [file elife-31130-supp-v1.zip]

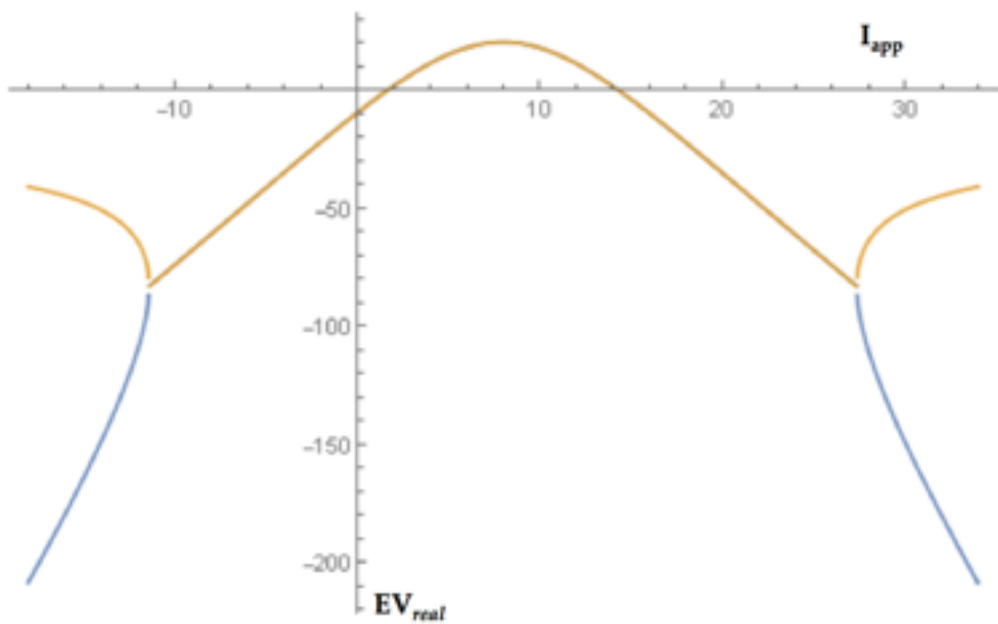

Supplement: supp [file elife-31130-supp-v1.zip]
